# Supplementary material for: Magnetic assembly and manipulation of Janus photonic crystal supraparticles from a colloidal mixture of spheres and ellipsoids
Source: Royal Society of Chemistry journal article supplement (doi:10.1039/d1tc01543e), 2021-01-01
Supplement: d1tc01543e1.pdf [file d1tc01543e1.pdf]

## Supporting Information

### Magnetic assembly and manipulation of Janus photonic crystal supraparticles from a colloidal mixture of spheres and ellipsoids

Mengqi Xiao,<sup>a</sup> Jingjing Liu,<sup>\*b</sup> Zhijie Chen,<sup>a</sup> Wenxuan Liu,<sup>a</sup> Chengcheng Zhang,<sup>a</sup> Yingying Yu,<sup>a</sup> Chaoran Li,<sup>\*a</sup> and Le He<sup>\*a</sup>

<sup>a</sup>Institute of Functional Nano & Soft Materials (FUNSOM), Jiangsu Key Laboratory for Carbon-Based Functional Materials & Devices, Soochow University, 199 Ren'ai Road, Suzhou, 215123, Jiangsu, PR China.

E-mail: lehe@suda.edu.cn; crli@suda.edu.cn

<sup>b</sup>Institute of Information Technology, Suzhou Institute of Trade and Commerce, Suzhou, 215009, Jiangsu, PR China.

E-mail: jjliu2015@sinano.ac.cn

## Supporting Information

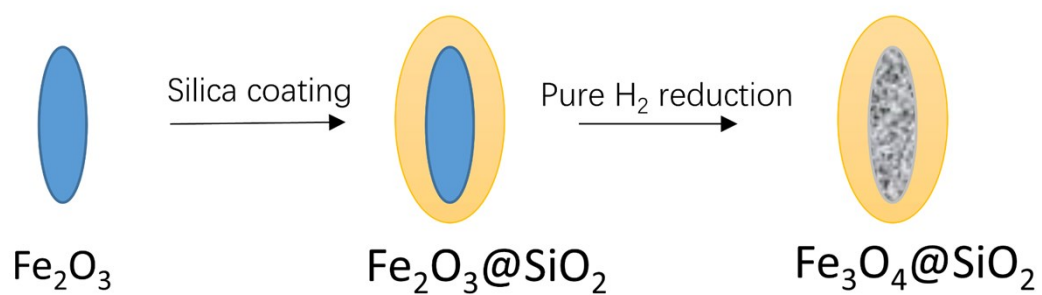

**Fig. S1 Schematic illustration of the preparation process of Fe<sub>3</sub>O<sub>4</sub>@SiO<sub>2</sub> nanoellipsoids.**

## Supporting Information

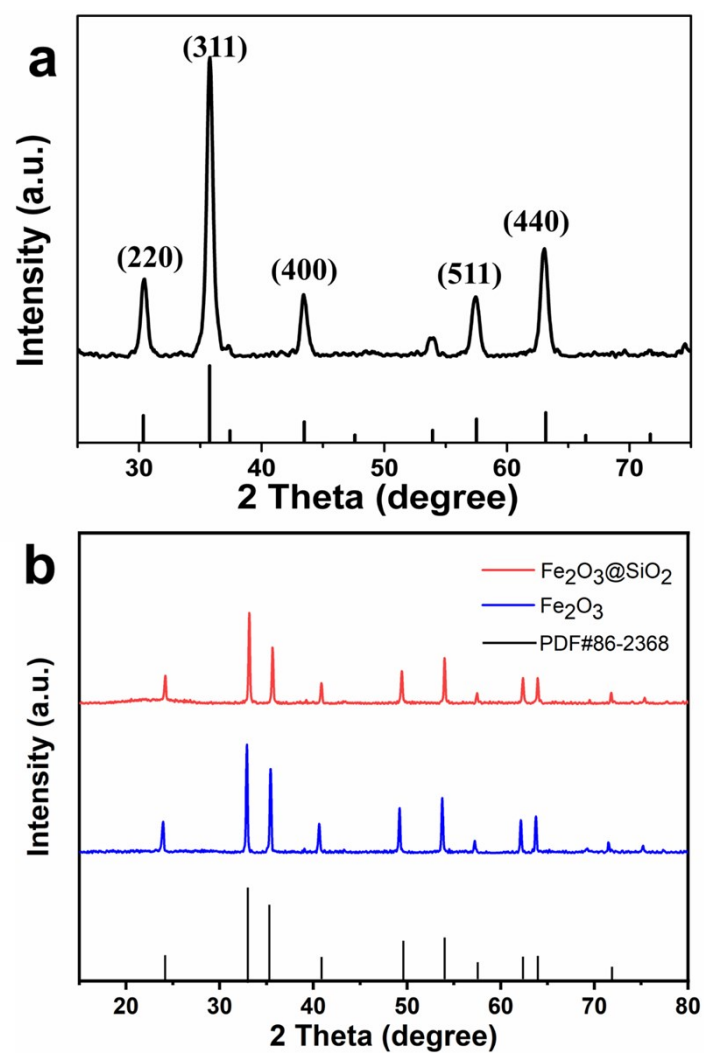

**Fig. S2** XRD patterns of (a)  $\text{Fe}_3\text{O}_4@\text{SiO}_2$ , and (b)  $\alpha\text{-Fe}_2\text{O}_3$  and  $\alpha\text{-Fe}_2\text{O}_3@\text{SiO}_2$  nanoellipsoids.

## Supporting Information

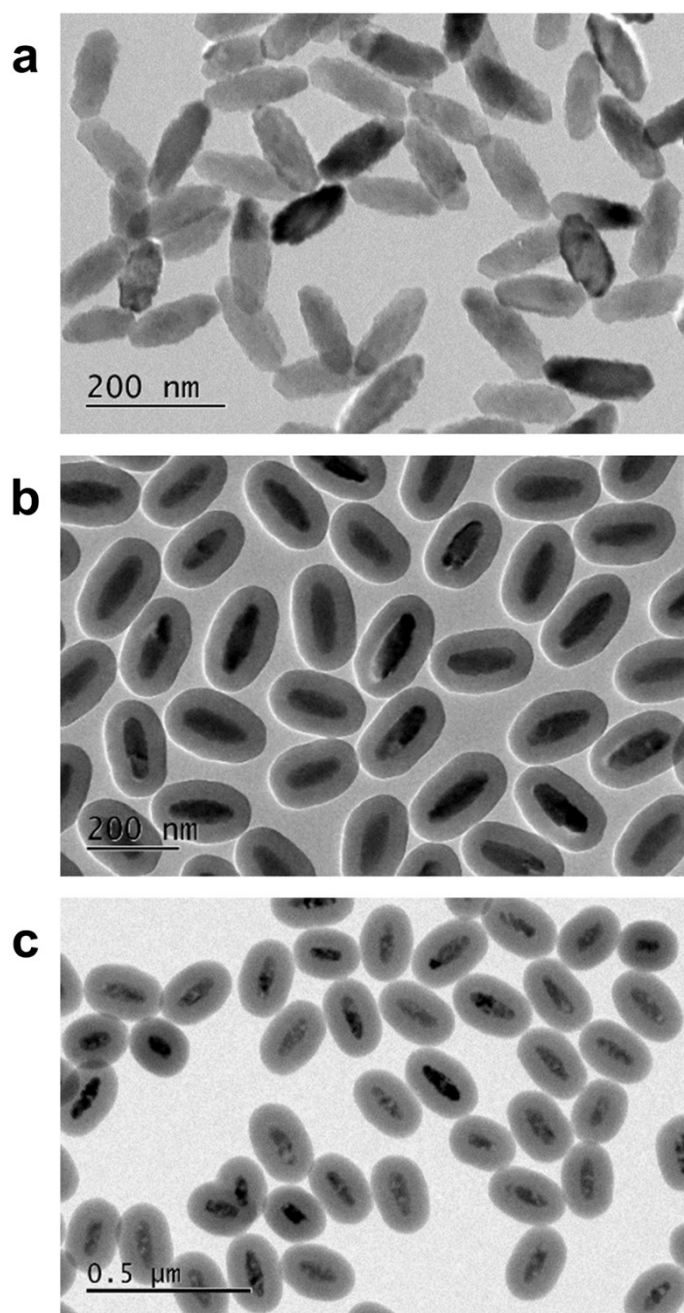

**Fig. S3** TEM images of (a)  $\alpha$ -Fe<sub>2</sub>O<sub>3</sub>, (b)  $\alpha$ -Fe<sub>2</sub>O<sub>3</sub>@SiO<sub>2</sub> and (c) Fe<sub>3</sub>O<sub>4</sub>@SiO<sub>2</sub> nanoellipsoids.

## Supporting Information

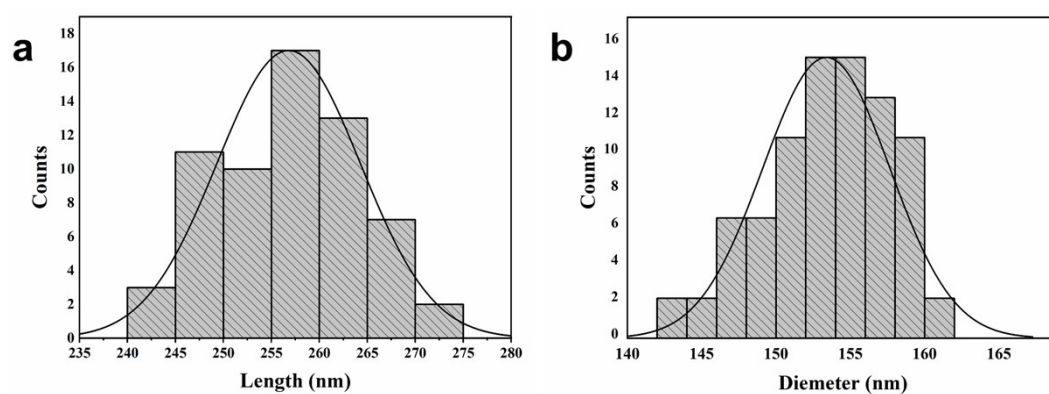

**Fig. S4** Size distribution of  $\text{Fe}_3\text{O}_4@\text{SiO}_2$  nanoellipsoids. (a) Their average length, obtained by measuring 100 particles, is  $255 \pm 10$  nm. (b) Their average diameter, obtained by measuring the same 100 particles, is  $155 \pm 5$  nm.

## Supporting Information

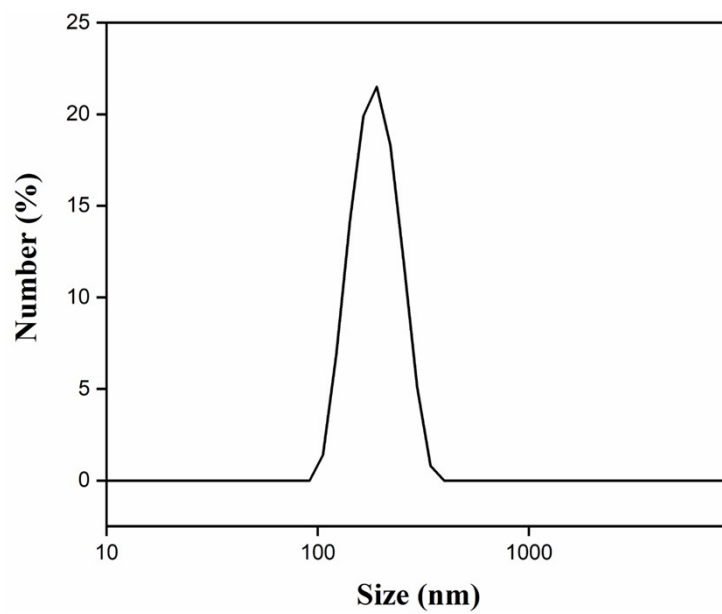

**Fig. S5** DLS curve of Fe<sub>3</sub>O<sub>4</sub>@SiO<sub>2</sub> aqueous dispersion.

## Supporting Information

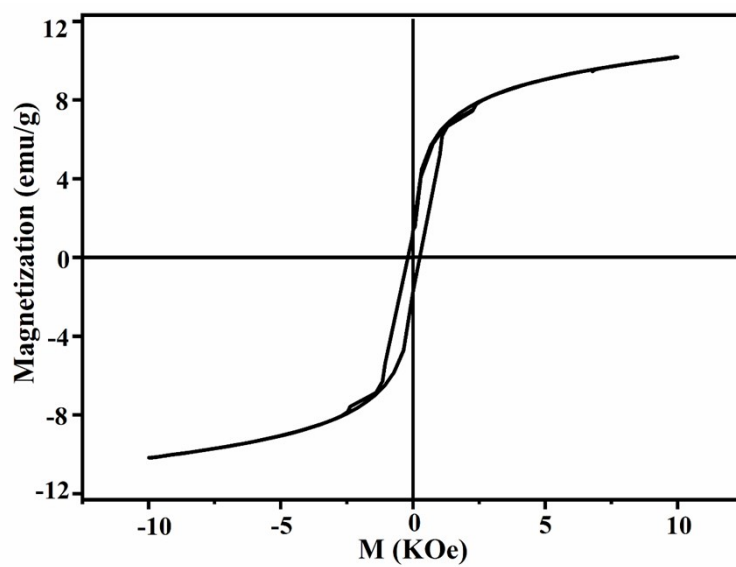

**Fig. S6** Hysteresis loop of the Fe<sub>3</sub>O<sub>4</sub>@SiO<sub>2</sub> nanoellipsoids at room temperature.

## Supporting Information

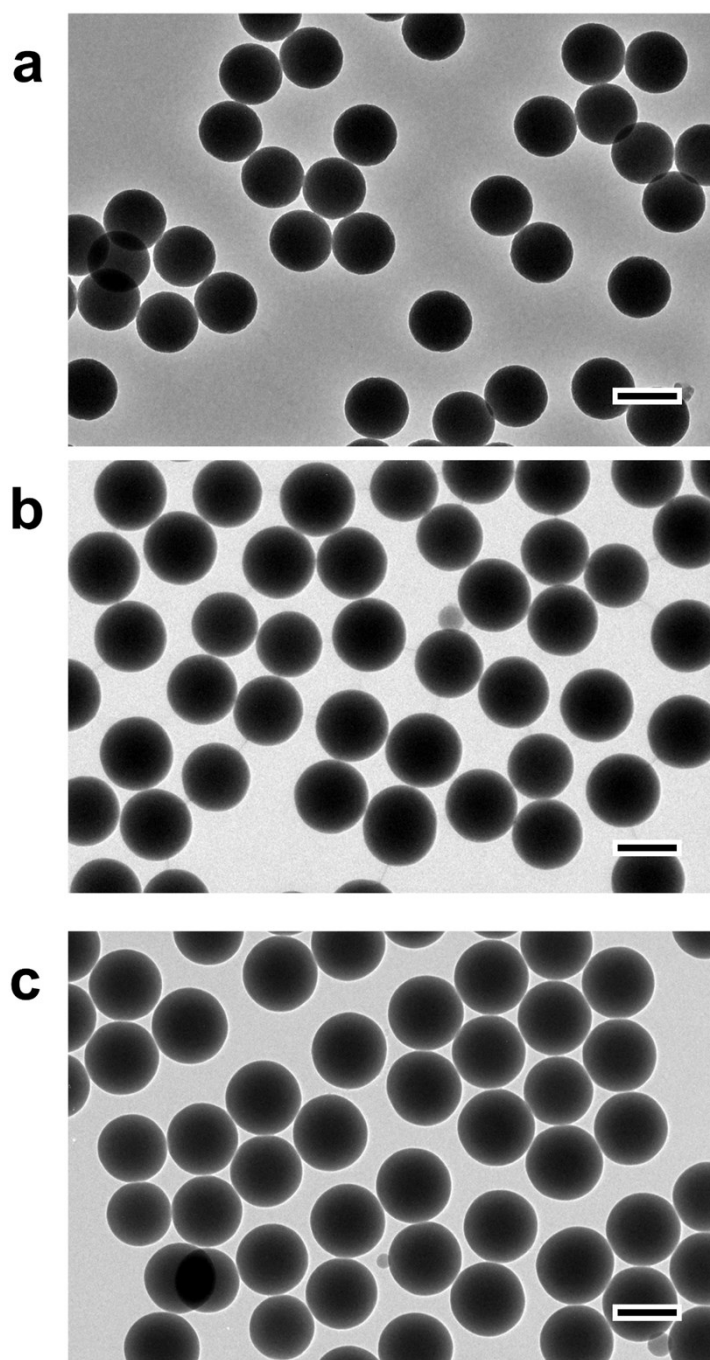

**Fig. S7** TEM images of SiO<sub>2</sub> nanospheres of different sizes: (a) 220 nm, (b) 260 nm, (c) 300 nm. Scale bars are 200 nm.

## Supporting Information

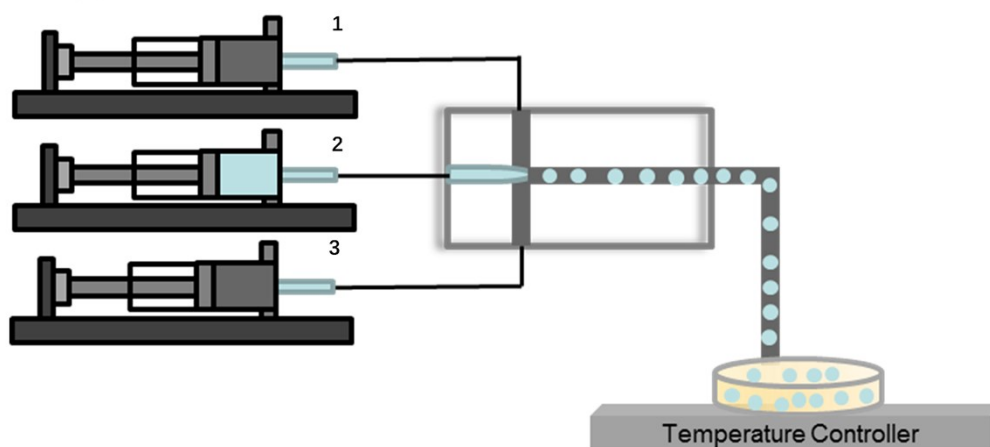

**Fig. S8** The microfluidic device for the generation of droplets.

## Supporting Information

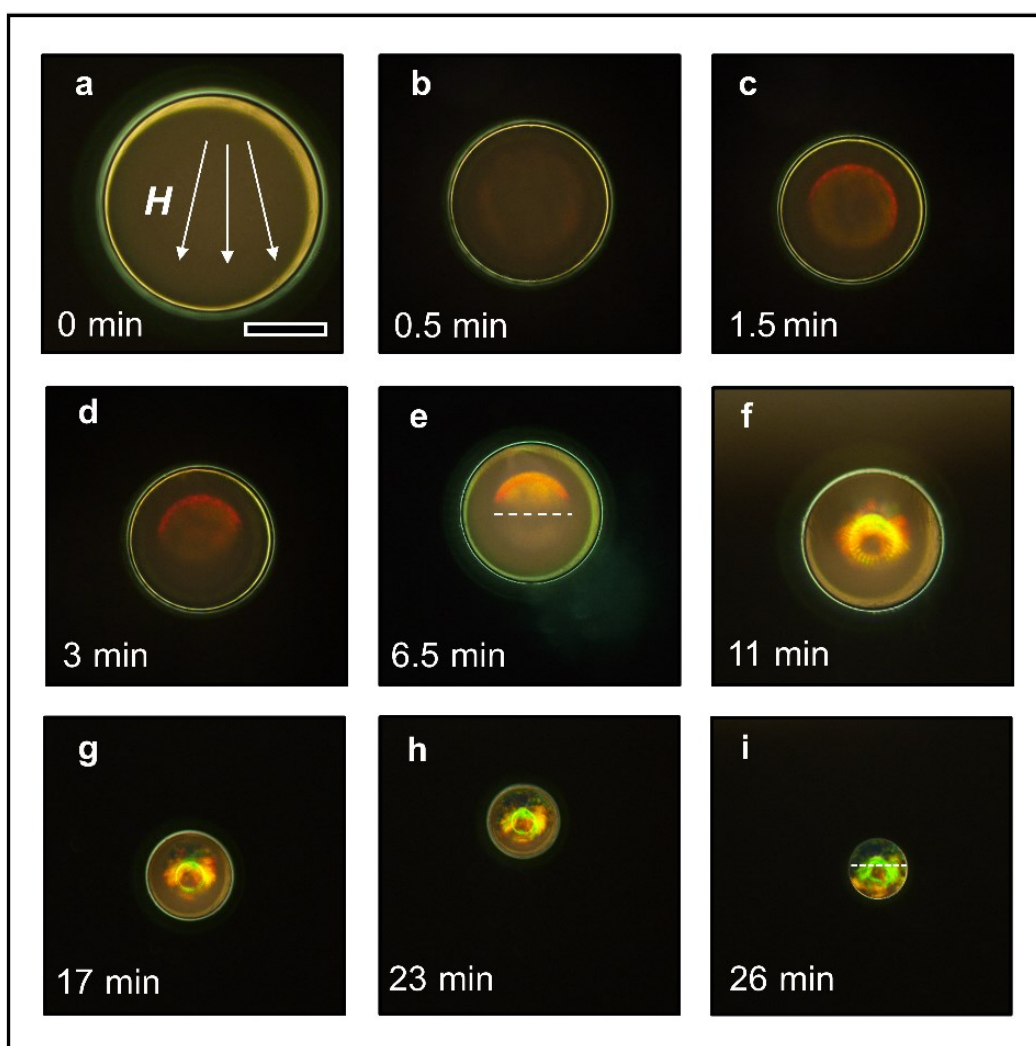

**Fig. S9** Optical microscopy images showing the assembly process of a single droplet under the horizontal magnetic field. Scale bar is 100  $\mu\text{m}$ .

## Supporting Information

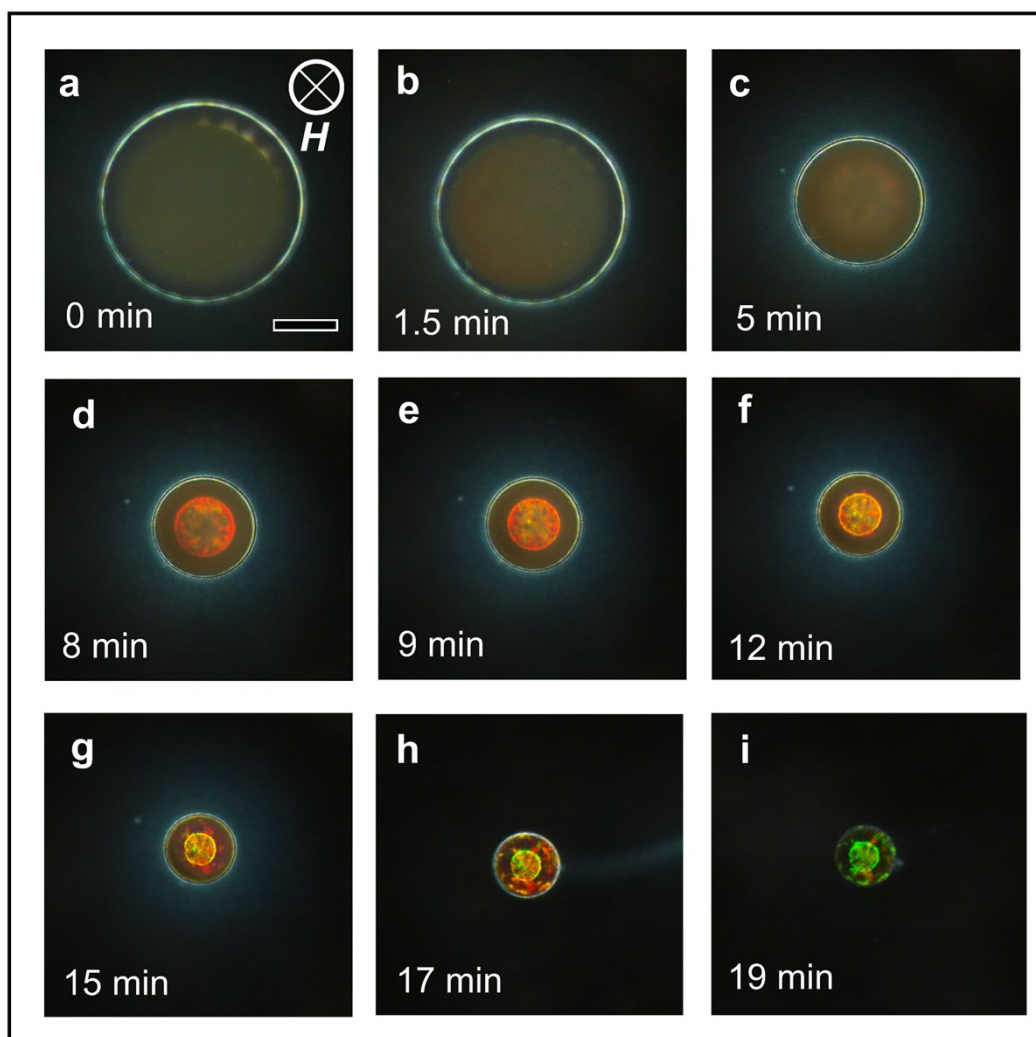

**Fig. S10** Optical microscopy images showing the assembly process of a single droplet under the vertical magnetic field. The field strength decreased from the bottom to the top. Scale bar is 100  $\mu\text{m}$ .

## Supporting Information

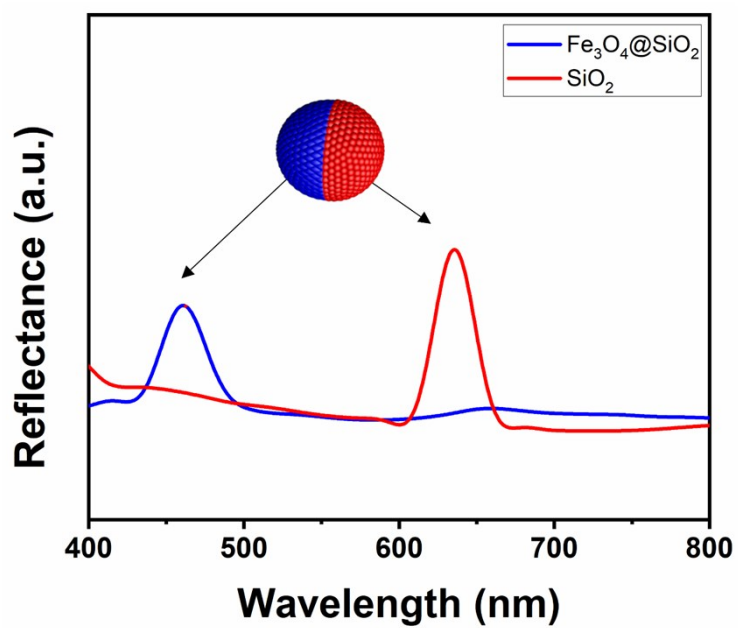

**Fig. S11** Reflection spectra of the two parts of a supraparticle.

## Supporting Information

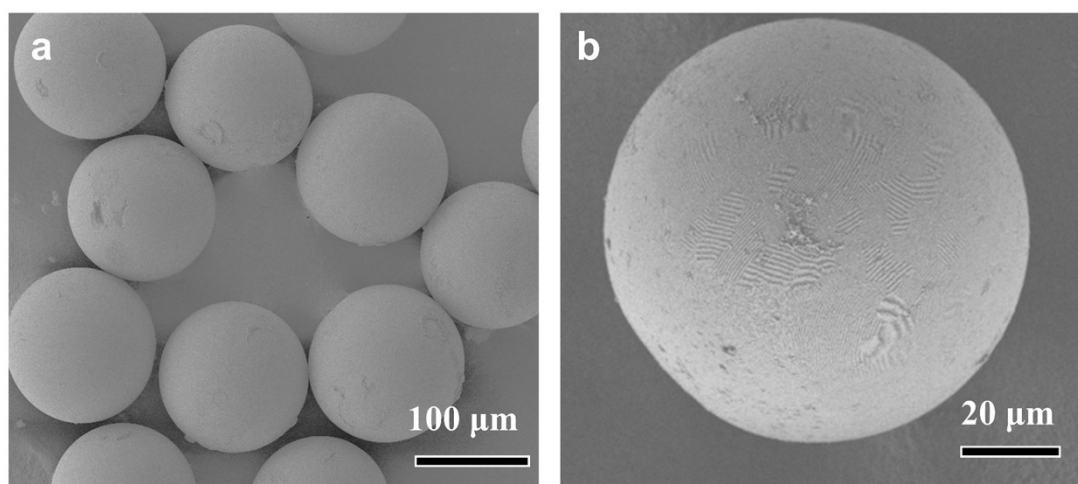

**Fig. S12** SEM images of Janus PCSs.

## Supporting Information

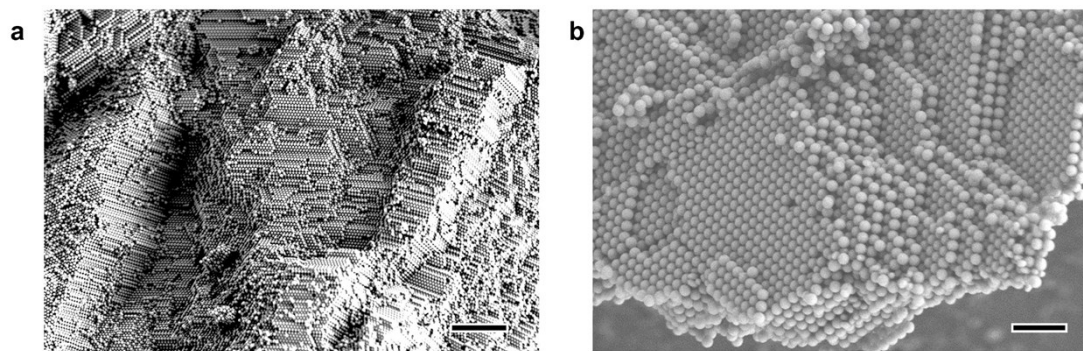

**Fig. S13** SEM images of the SiO<sub>2</sub> part from a broken supraparticle. Scale bars are 5 μm for (a) and 1 μm for (b).

## Supporting Information

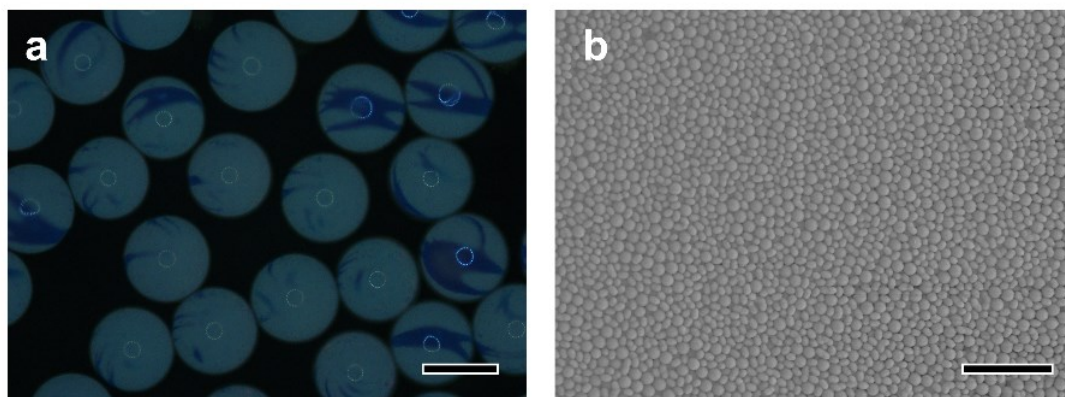

**Fig. S14** (a) Optical microscopy and (b) SEM images of supraparticles dried in the absence of magnetic fields. Scale bars are 100  $\mu\text{m}$  for (a) and 1  $\mu\text{m}$  for (b).

## Supporting Information

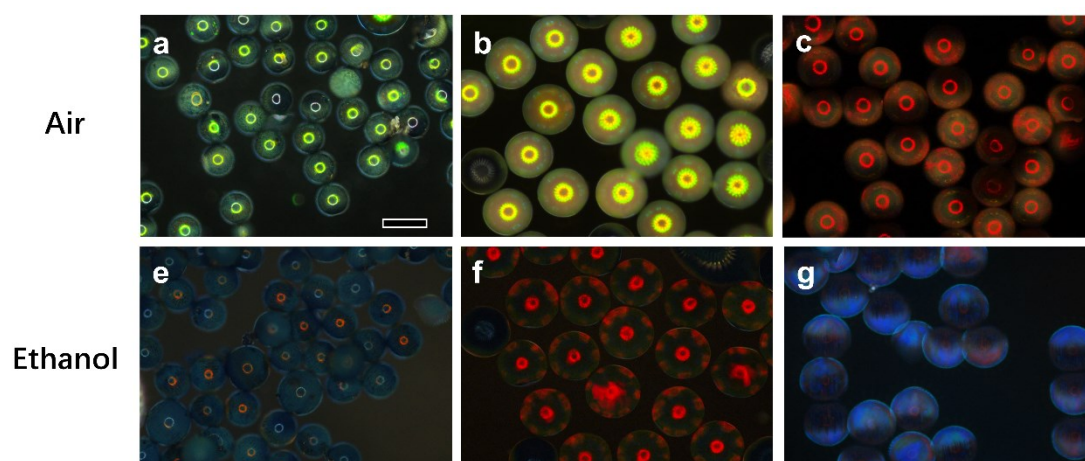

**Fig. S15** Dark-field optical microscope images of supraparticles made up of different sizes  $\text{SiO}_2$ . Scale bar is 100  $\mu\text{m}$ .

## Supporting Information

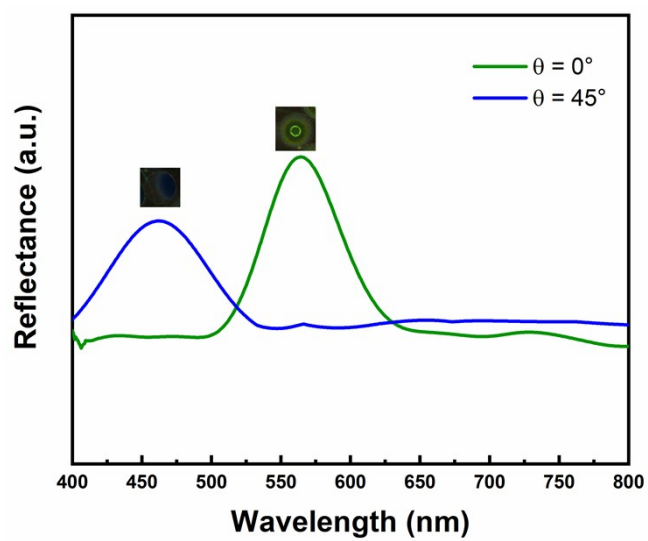

**Fig. S16** Reflection spectra of supraparticles in response to magnetic fields with different directions.

# Supporting Information

## **Supplementary Video**

**Video S1** Magnetic tuning of structural color of the free-standing supraparticles.
